# Supplementary material
Source: Copernicus journal article supplement (doi:10.5194/acp-26-7081-2026)
Supplement: Supplementary file 1 [file acp-26-7081-2026-supplement.pdf]

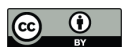

*Supplement of*

## **Long-term ozone formation sensitivity in China: spatiotemporal evolution and machine learning attribution**

**Jinglan Lin et al.**

*Correspondence to:* Weihua Chen ([chenwh26@jnu.edu.cn](mailto:chenwh26@jnu.edu.cn))

The copyright of individual parts of the supplement might differ from the article licence.

5 **Table S1. Comparison of the FNR threshold ranges for the five city clusters during the warm season (April–September 2005–2023)**  
6 **derived in this study and reported in previous studies. Values in brackets indicate the threshold ranges.**

| Region | FNR threshold ranges           |                               |                               | Threshold Range | Studied period         | Reference                          | Spatial Coverage   |
|--------|--------------------------------|-------------------------------|-------------------------------|-----------------|------------------------|------------------------------------|--------------------|
|        | Scenarios 1 (S1 <sup>1</sup> ) | Scenario 2 (S2 <sup>2</sup> ) | Scenario 3 (S3 <sup>3</sup> ) |                 |                        |                                    |                    |
|        |                                |                               |                               | [2.0, 3.1]      | Apr.–Sep.<br>2019–2022 | BTH                                | Song et al., 2023  |
|        |                                |                               |                               | [4.0, 5.1]      | May–Oct.<br>2018–2022  | Jing-Jin-Ji-Lu-Yu<br>(JJLY)        | Li et al., 2024    |
|        |                                |                               |                               | [3.0, 3.8]      | Apr.–Sep.<br>2019–2021 | Beijing-Tianjin-<br>Hebei-Shandong | Ren et al., 2022   |
| BTH    | 2.33[1.51, 3.30]               | [1.00, 5.10]                  | [1.92, 2.85]                  | [1.142, 2.268]  | May–Nov.<br>2016–2018  | North China (NC)                   | Du et al., 2022    |
|        |                                |                               |                               | [1.2, 2.0]      | Apr.–Oct.<br>2013–2014 |                                    |                    |
|        |                                |                               |                               | [1.1, 1.9]      | Apr.–Oct.<br>2015–2016 | BTH                                | Zhang et al., 2024 |
|        |                                |                               |                               | [1.0, 1.8]      | Apr.–Oct.<br>2017–2019 |                                    |                    |
|        |                                |                               |                               | [1.142, 2.268]  | May–Nov.<br>2016–2018  | North China (NC)                   | Du et al., 2022    |
| FWP    | 3.42[2.26, 4.77]               | [1.14, 4.30]                  | [1.96, 3.19]                  | [1.524, 3.001]  | May–Nov.<br>2016–2018  | Northwest China<br>(NWC)           | Du et al., 2022    |
|        |                                |                               |                               | [3.2, 4.3]      | Apr.–Sep.<br>2019–2021 | Shanxi-Shaanxi-<br>Henan           | Ren et al., 2022   |

|     |                  |              |              |                |                        |                                                 |                    |
|-----|------------------|--------------|--------------|----------------|------------------------|-------------------------------------------------|--------------------|
|     |                  |              |              | [2.9, 4.0]     | May–Oct.<br>2018–2022  | Jiang-Zhe-Hu-Wan<br>(JZHW)                      | Li et al., 2024    |
|     |                  |              |              | [2.2, 3.3]     | Apr.–Sep.<br>2019–2021 | Shanghai-Jiangsu-<br>Zhejiang-Anhui             | Ren et al., 2022   |
| YRD | 1.59[0.90, 2.37] | [1.00, 4.00] | [1.72, 2.64] | [1.3, 2.1]     | Apr.–Oct.<br>2013–2014 |                                                 |                    |
|     |                  |              |              | [1.2, 2.0]     | Apr.–Oct.<br>2015–2016 | YRD                                             | Zhang et al., 2024 |
|     |                  |              |              | [1.0, 1.8]     | Apr.–Oct.<br>2017–2019 |                                                 |                    |
|     |                  |              |              | [3.1, 4.2]     | May–Oct.<br>2018–2022  | Chuan-Yu (CY)                                   | Li et al., 2024    |
|     |                  |              |              | [0.887, 2.479] | May–Nov.<br>2016–2018  | Southwest China<br>(SWC)                        | Du et al., 2022    |
|     |                  |              |              | [2.5, 4.3]     | Apr.–Sep.<br>2019–2021 | Sichuan-<br>Chongqing-<br>Guizhou-Yunnan        | Ren et al., 2022   |
| SCB | 3.24[1.93, 4.73] | [0.89, 4.30] | [1.70, 2.85] | [1.4, 2.2]     | Apr.–Oct.<br>2013–2014 |                                                 |                    |
|     |                  |              |              | [1.2, 2.0]     | Apr.–Oct.<br>2015–2016 | Chuan-Yu<br>(CY)                                | Zhang et al., 2024 |
|     |                  |              |              | [1.1, 1.9]     | Apr.–Oct.<br>2017–2019 |                                                 |                    |
|     |                  |              |              | [2.3, 3.4]     | May–Oct.<br>2018–2022  | Guangdong-Hong<br>Kong-Macao-<br>Guangxi-Hainan | Li et al., 2024    |
|     |                  |              |              | [1.041, 3.068] | May–Nov.<br>2016–2018  | South China (SC)                                | Du et al., 2022    |
|     |                  |              |              | [2.7, 3.8]     | Apr.–Sep.<br>2019–2021 | Guangdong-Hong<br>Kong-Macao-<br>Guangxi-Hainan | Ren et al., 2022   |
| PRD | 2.62[1.66, 3.70] | [1.04, 3.80] | [2.02, 3.13] | [2.4, 3.2]     | Apr.–Oct.<br>2013–2014 |                                                 |                    |
|     |                  |              |              | [2.0, 2.8]     | Apr.–Oct.<br>2015–2016 | Guangdong                                       | Zhang et al., 2024 |
|     |                  |              |              | [1.7, 2.5]     | Apr.–Oct.              |                                                 |                    |

|       |                  |              |              | 2017–2019              |       |                   |
|-------|------------------|--------------|--------------|------------------------|-------|-------------------|
|       |                  |              | [2.3, 4.2]   | May–Oct.<br>2016–2019  | China | Wang et al., 2021 |
|       |                  |              | [2.2, 3.2]   | Apr.–Sep.<br>2019–2021 | China | Ren et al., 2022  |
| China | 2.02[1.20, 2.97] | [1.65, 4.20] | [2.03, 3.51] | Jun.–Aug. 2023         | China | Fan et al., 2025  |
|       |                  |              | [1.92, 3.77] | Sep.–Nov. 2023         | China | Fan et al., 2025  |
|       |                  |              | [2.10, 3.87] | May–Nov.<br>2016–2018  | China | Du et al., 2022   |
| ORC   | 2.07[1.17, 3.08] | /            | /            | /                      | /     | /                 |

7 <sup>1</sup> S1 denotes the region-specific thresholds derived in this study. <sup>2</sup> S2 denotes the minimum–maximum threshold ranges compiled from  
8 previous studies. <sup>3</sup> S3 denotes the averaged threshold ranges based on the corresponding minimum and maximum values.

9 **Table S2. Mann–Kendall trend test and Sen’s slope estimate for HCHO, NO<sub>2</sub>, and FNR in the five major urban agglomerations in**  
 10 **China during the warm season (April–September) from 2005 to 2023.**

| Variable                     | Region | Sen’s slope | MK p-value | Pettitt’s change point | Pettitt’s p-value |
|------------------------------|--------|-------------|------------|------------------------|-------------------|
| NO <sub>2</sub> <sup>a</sup> | BTH    | -0.23       | < 0.05     | 2015                   | < 0.05            |
|                              | FWP    | -0.09       | < 0.05     | 2014                   | < 0.05            |
|                              | YRD    | -0.14       | < 0.05     | 2014                   | < 0.05            |
|                              | SCB    | -0.01       | > 0.05     | 2008                   | > 0.05            |
|                              | PRD    | -0.20       | < 0.05     | 2014                   | < 0.05            |
| HCHO <sup>a</sup>            | BTH    | 0.15        | < 0.05     | 2013                   | < 0.05            |
|                              | FWP    | 0.12        | < 0.05     | 2015                   | < 0.05            |
|                              | YRD    | 0.12        | < 0.05     | 2015                   | < 0.05            |
|                              | SCB    | 0.09        | < 0.05     | 2017                   | < 0.05            |
|                              | PRD    | 0.06        | < 0.05     | 2015                   | > 0.05            |
| FNR <sup>b</sup>             | BTH    | 0.06        | < 0.05     | 2014                   | < 0.05            |
|                              | FWP    | 0.06        | < 0.05     | 2013                   | < 0.05            |
|                              | YRD    | 0.04        | < 0.05     | 2013                   | < 0.05            |
|                              | SCB    | 0.00        | < 0.05     | 2017                   | > 0.05            |
|                              | PRD    | 0.06        | > 0.05     | 2014                   | < 0.05            |

11 <sup>a</sup> HCHO and NO<sub>2</sub> are reported in units of  $\times 10^{15}$  molec cm<sup>-2</sup>. <sup>b</sup> FNR is dimensionless.

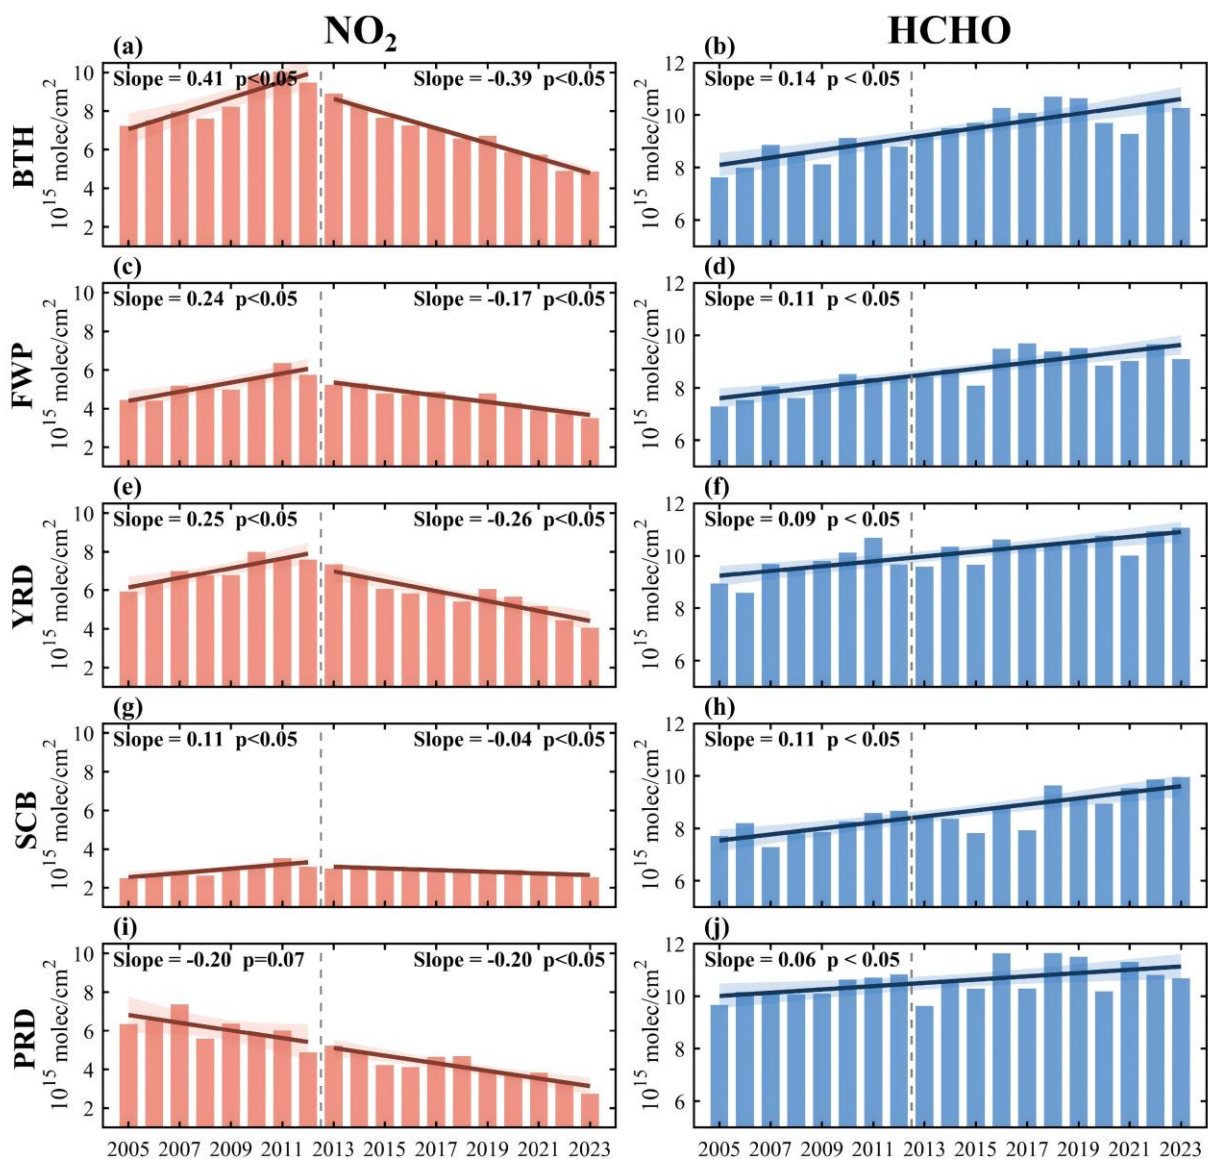

12 Figure S1. Interannual variations of  $\text{NO}_2$  and HCHO column density in five key regions of China during the warm season (April–  
 13 September) from 2005 to 2023.

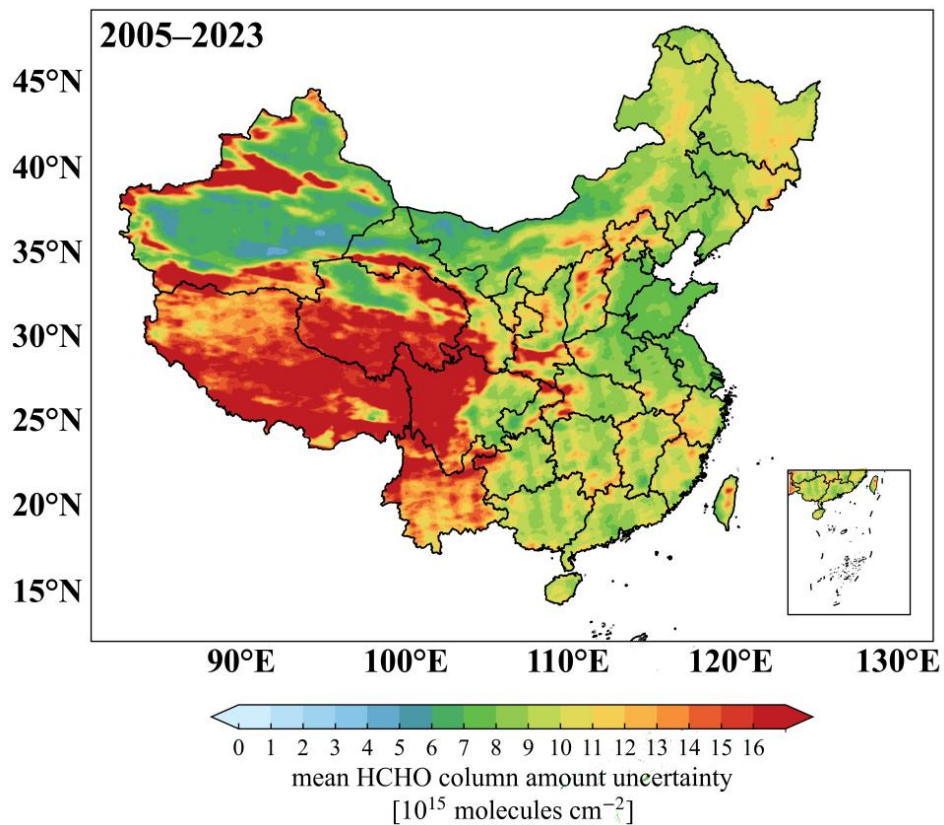

14 Figure S2. Uncertainty of the mean HCHO column over China during the warm season (April–September) from 2005 to 2023.

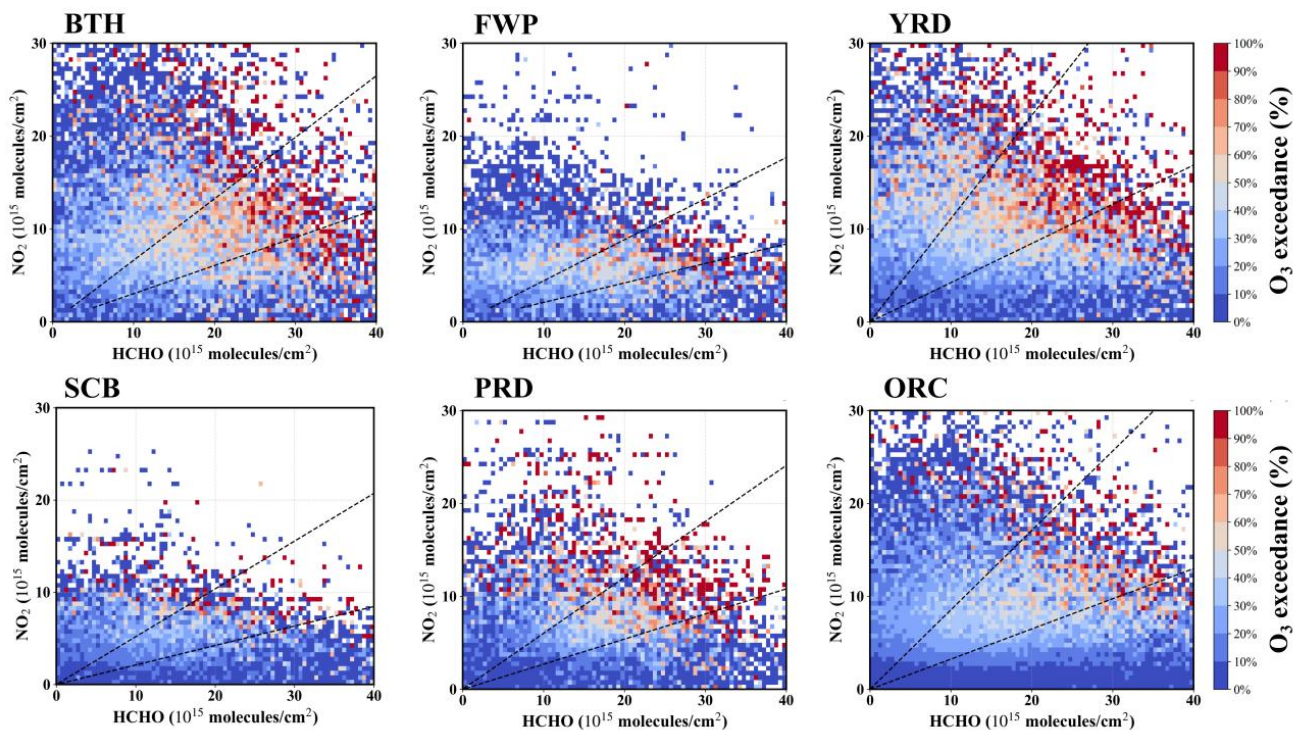

15 **Figure S3. O<sub>3</sub> exceedance probability as a function of OMI HCHO and NO<sub>2</sub> for the six regions during the warm season (April–**  
 16 **September) from 2015 to 2023. The black dashed lines indicate the OMI HCHO/NO<sub>2</sub> values corresponding to the derived FNR**  
 17 **threshold ranges used to classify NO<sub>x</sub>-limited, transitional, and VOC-limited regimes.**

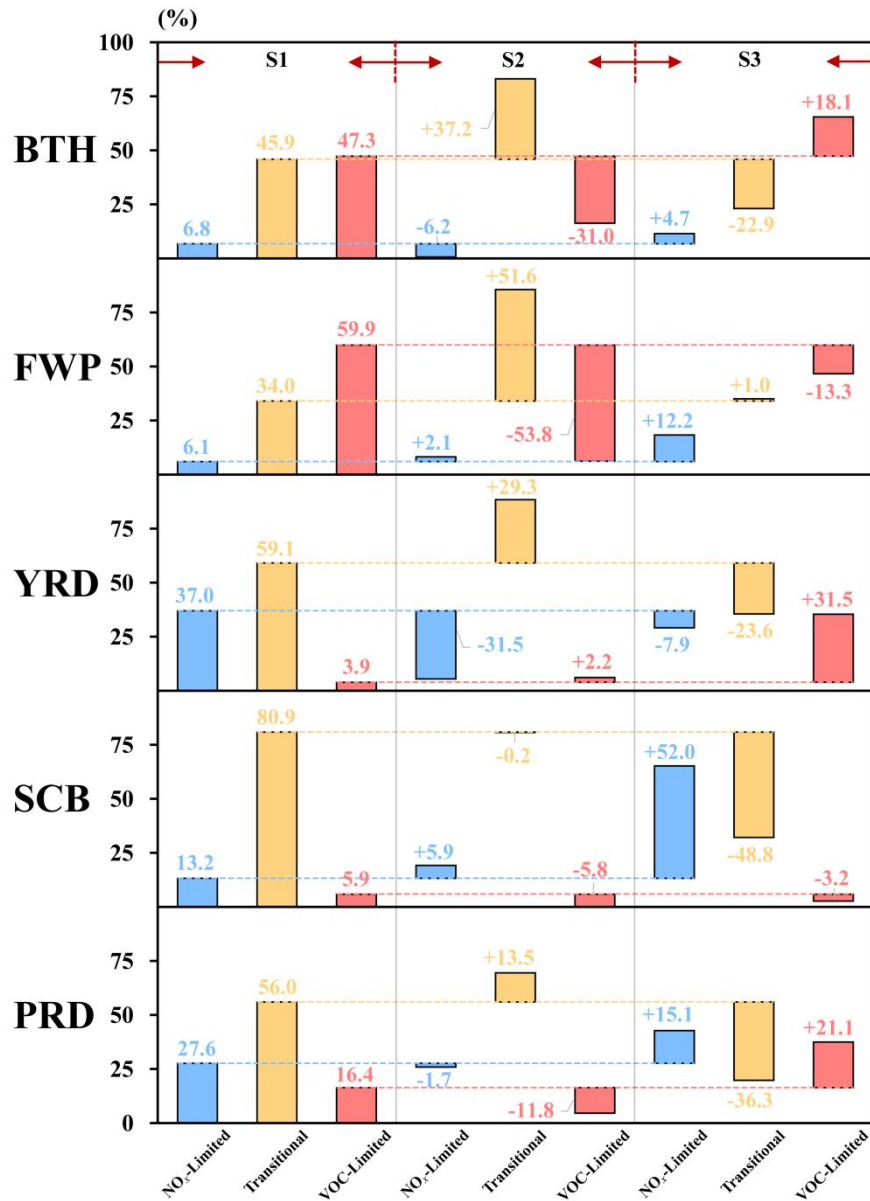

18 Figure S4. Sensitivity of OFS regime area fractions to different FNR threshold scenarios in the five major city clusters during the  
 19 warm season (April–September) over 2005–2023. S1 denotes the region-specific thresholds derived in this study, S2 denotes the  
 20 minimum–maximum threshold ranges compiled from previous studies, and S3 denotes the averaged threshold ranges based on the  
 21 corresponding minimum and maximum values. Bars represent deviations in regime area fractions under S2 and S3 relative to S1.

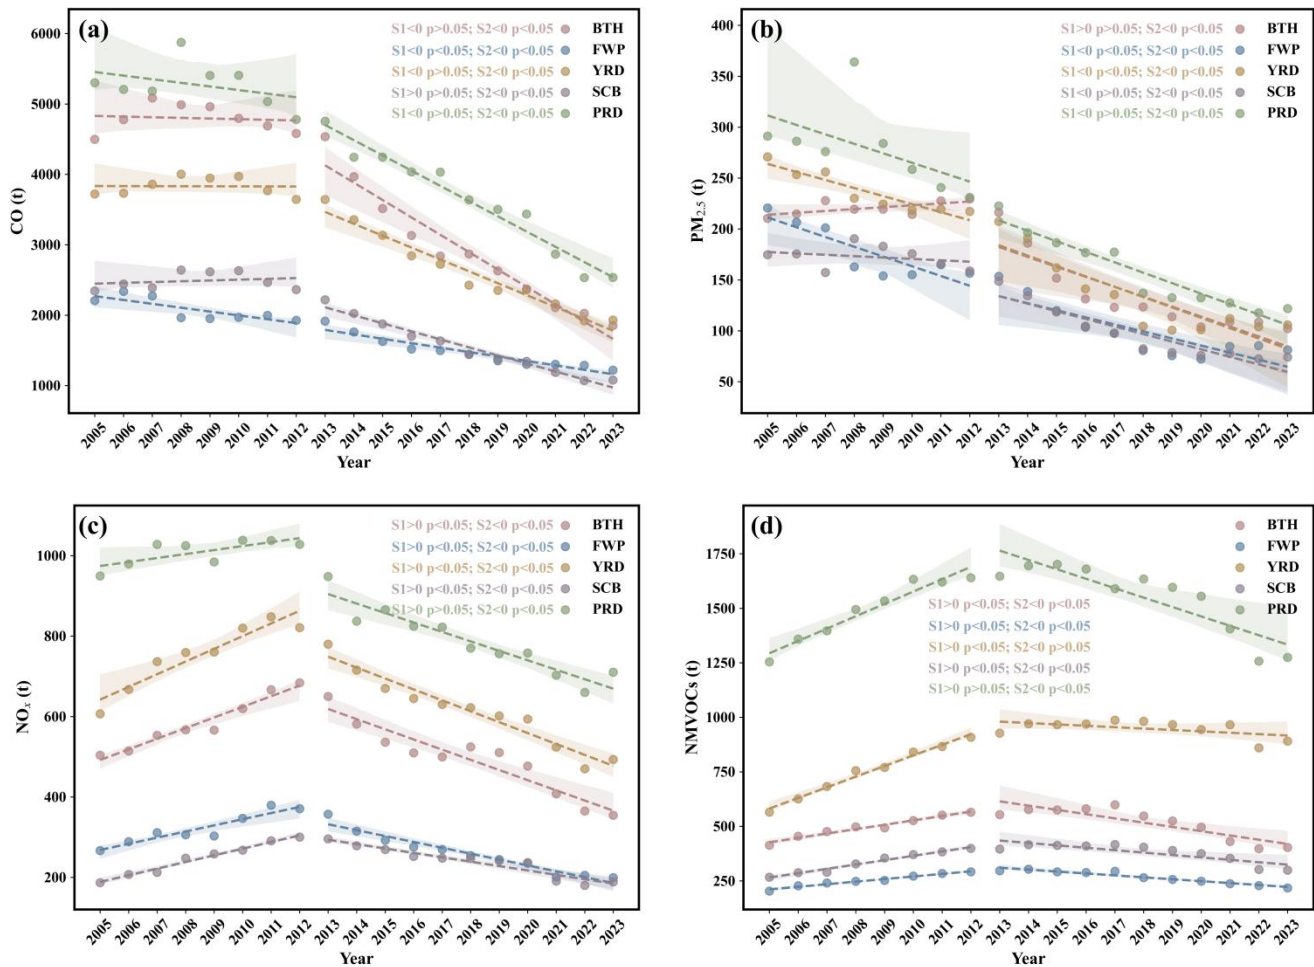

22 Figure S5. Interannual variations in warm-season (April–September) mean anthropogenic emissions of (a) CO, (b) PM<sub>2.5</sub>, (c) NO<sub>x</sub>,  
 23 and (d) NMVOCs in the five city clusters from 2005 to 2023. Dots represent the annual mean values, dashed lines indicate the  
 24 linear trends, and shaded areas show the 95% confidence intervals.

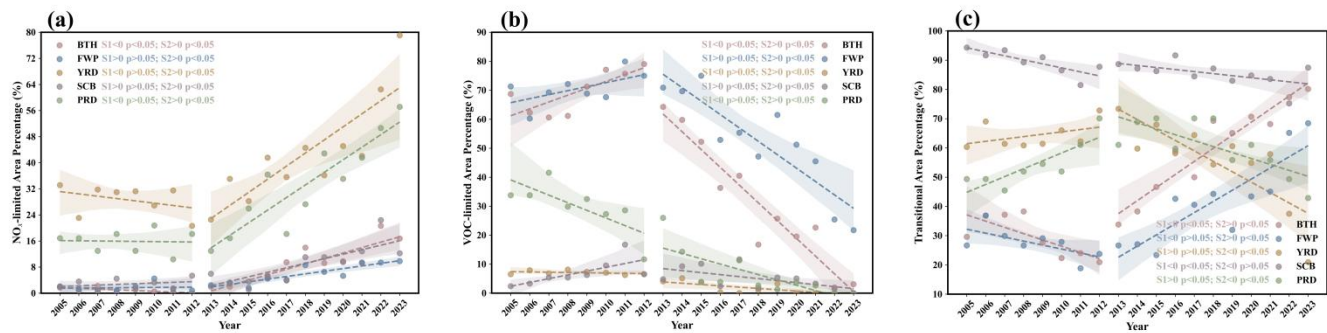

25 Figure S6. Interannual variations in warm-season (April–September) mean area fractions of (a) NO<sub>x</sub>-limited, (b) VOC-limited and  
 26 (c) transitional regimes in the five city clusters from 2005 to 2023. Dots represent the annual mean values, dashed lines indicate the  
 27 linear trends, and shaded areas show the 95% confidence intervals.

28 **Reference**

- 29 Du, X., Tang, W., Cheng, M., Zhang, Z., Li, Y., Li, Y., and Meng, F.: Modeling of spatial and temporal variations of ozone-  
30 NO<sub>x</sub>-VOC sensitivity based on photochemical indicators in China, *J. Environ. Sci.*, 114, 454–464,  
31 <https://doi.org/10.1016/j.jes.2021.12.026>, 2022.
- 32 Fan, J., Yu, C., Li, Y., Zhang, Y., Fan, M., Tao, J., and Chen, L.: Comparison of FNR and GNR Based on TROPOMI  
33 Satellite Data for Ozone Sensitivity Analysis in Chinese Urban Agglomerations, *Remote Sens.*, 17, 3321,  
34 <https://doi.org/10.3390/rs17193321>, 2025.
- 35 Li, Y., Yu, C., Tao, J., Lu, X., and Chen, L.: Analysis of Ozone Formation Sensitivity in Chinese Representative Regions  
36 Using Satellite and Ground-Based Data, *Remote Sens.*, 16, 316, <https://doi.org/10.3390/rs16020316>, 2024.
- 37 Ren, J., Guo, F., and Xie, S.: Diagnosing ozone–NO<sub>x</sub>–VOC sensitivity and revealing causes of ozone increases in China  
38 based on 2013–2021 satellite retrievals, *Atmos. Chem. Phys.*, 22, 15035–15047, [https://doi.org/10.5194/acp-22-15035-](https://doi.org/10.5194/acp-22-15035-2022)  
39 2022, 2022.
- 40 Song, H., Zhao, W., Yang, X., Hou, W., Chen, L., and Ma, P.: Ozone Sensitivity Analysis and Ozone Formation Regimes  
41 Division in the Beijing–Tianjin–Hebei Region Based on Satellite Remote Sensing Data, *Atmosphere*, 14, 1637,  
42 <https://doi.org/10.3390/atmos14111637>, 2023.
- 43 Wang, W., van der A, R., Ding, J., van Weele, M., and Cheng, T.: Spatial and temporal changes of the ozone sensitivity in  
44 China based on satellite and ground-based observations, *Atmos. Chem. Phys.*, 21, 7253–7269, [https://doi.org/10.5194/acp-](https://doi.org/10.5194/acp-21-7253-2021)  
45 21-7253-2021, 2021.
- 46 Zhang, J., Shen, A., Jin, Y., Cui, Y., Xu, Y., Lu, X., Liu, Y., and Fan, Q.: Evolution of ozone formation regimes during  
47 different periods in representative regions of China, *Atmos. Environ.*, 338, 120830,  
48 <https://doi.org/10.1016/j.atmosenv.2024.120830>, 2024.
